# Supplementary material
Source: PubMed Central journal article supplement (PMC1965525)

Pol III $\Delta$ +rC11+r(C37-C53) (16°C)

Time (s) 0 15 30 60 90 120 300

17 —  
15 —

18 —  
16 —  
15 —

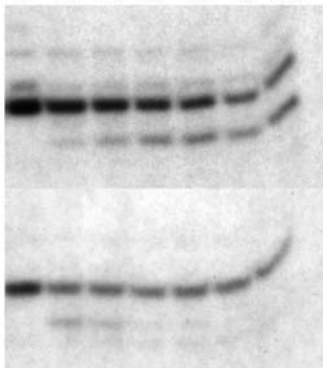

Supplement: pnas_0704116104_2.pdf [file pnas_0704116104_2.pdf]
